# Supplementary material for: The value of monitoring data in a process evaluation of hygiene behaviour change in Community Health Clubs to explain findings from a cluster-randomised controlled trial in Rwanda
Source: PubMed Central journal article supplement (PMC6979057; doi:10.1186/s12889-019-7991-7), 2020-01-23

HOUSEHOLD INVENTORY MONITORING TOOL

Developed by Africa AHEAD for the Ministry of Health Rwanda (2013 - 2017)

Community Based Environmental Health Promotion Programme (CBEHPP)

Technical Assistance of Mobile Technology - Overtone

|                                                                          |  |  |  |
|--------------------------------------------------------------------------|--|--|--|
| <b>Mobile Data Collection Tools v2.0 - Content Design Specifications</b> |  |  |  |
|--------------------------------------------------------------------------|--|--|--|

| Q Code | Title                                          | Explanation                                                   | A # | Multiple choice | Required | Traffic Light |  |
|--------|------------------------------------------------|---------------------------------------------------------------|-----|-----------------|----------|---------------|--|
|        |                                                |                                                               |     |                 |          |               |  |
| MID    | Device ID                                      |                                                               |     |                 | *        |               |  |
| MStart | Start Time                                     |                                                               |     |                 | *        |               |  |
| MEnd   | End Time                                       |                                                               |     |                 | *        |               |  |
|        |                                                |                                                               |     |                 |          |               |  |
|        |                                                |                                                               |     |                 |          |               |  |
| E1     | Name of enumerator                             | <i>Please write your family name and first name .</i>         |     |                 | *        |               |  |
| E2     | Enumerator's code                              | <i>Please write your code.</i>                                |     |                 | *        |               |  |
|        |                                                |                                                               |     |                 |          |               |  |
|        |                                                |                                                               |     |                 |          |               |  |
| LN1    | Country name                                   |                                                               |     |                 | *        |               |  |
| LN2    | District name                                  |                                                               |     |                 | *        |               |  |
| LN3    | Sector / Ward name                             |                                                               |     |                 | *        |               |  |
| LN4    | Cell name                                      |                                                               |     |                 | *        |               |  |
| LN5    | Village name                                   |                                                               |     |                 | *        |               |  |
| LN6    | CHC name                                       |                                                               |     |                 |          |               |  |
| LN7    | Confirm you have entered the correct location. | Swipe to next question if this is correct or go back to edit. |     |                 |          |               |  |
|        |                                                |                                                               |     |                 |          |               |  |
|        |                                                |                                                               |     |                 |          |               |  |
| LC1    | Country code                                   |                                                               |     |                 | *        |               |  |
| LC2    | District code                                  |                                                               |     |                 | *        |               |  |
| LC3    | Sector / Ward code                             |                                                               |     |                 | *        |               |  |

|     |                                                  |                                                                                               |             |                      |   |  |
|-----|--------------------------------------------------|-----------------------------------------------------------------------------------------------|-------------|----------------------|---|--|
| LC4 | Cell code                                        |                                                                                               |             |                      | * |  |
| LC5 | Village code                                     |                                                                                               |             |                      | * |  |
| LC6 | CHC code                                         | <i>If not a CHC write "0".</i>                                                                |             |                      | * |  |
| LC7 | Confirm you have entered the correct CHC code.   | Swipe to next question if this full code is correct or go back to edit.                       |             |                      | * |  |
|     |                                                  |                                                                                               |             |                      |   |  |
| ST1 | Type of survey                                   | <i>Please select one of the below.</i>                                                        |             |                      | * |  |
|     |                                                  |                                                                                               | Base        | Base line            |   |  |
|     |                                                  |                                                                                               | Mid         | Mid line             |   |  |
|     |                                                  |                                                                                               | End         | End line             |   |  |
|     |                                                  |                                                                                               | Monthly     | Monthly              |   |  |
|     |                                                  |                                                                                               | Annual      | Annually             |   |  |
|     |                                                  |                                                                                               | Test        | Test                 |   |  |
| ST2 | Training level                                   | <i>Please select which type of training this village has received.</i>                        |             |                      | * |  |
|     |                                                  |                                                                                               | Classic     | Classic              |   |  |
|     |                                                  |                                                                                               | Lite        | Lite                 |   |  |
|     |                                                  |                                                                                               | None        | None                 |   |  |
| ST3 | Settlement type                                  | <i>Note where the household is located.</i>                                                   |             |                      | * |  |
|     |                                                  |                                                                                               | Urban       | Urban                |   |  |
|     |                                                  |                                                                                               | Peri Urban  | Peri Urban           |   |  |
|     |                                                  |                                                                                               | Rural       | Rural                |   |  |
|     |                                                  |                                                                                               | Camp        | Camp (IDP / Refugee) |   |  |
| ST4 | Are any of these services provided to this area? | <i>If applicable select more than one. If not sure or don't know then skip this question.</i> |             |                      |   |  |
|     |                                                  |                                                                                               | Water       | Water                |   |  |
|     |                                                  |                                                                                               | Electricity | Electricity          |   |  |
|     |                                                  |                                                                                               | Garbage     | Garbage collection   |   |  |
|     |                                                  |                                                                                               | None        | No services provided |   |  |
| ST5 | What is the household's GPS location?            | <i>Ensure location / GPS positioning is enabled on the device to set current location.</i>    |             |                      |   |  |
|     |                                                  |                                                                                               |             |                      |   |  |

|     |                                                                 |                                                                                                |                |                               |   |  |
|-----|-----------------------------------------------------------------|------------------------------------------------------------------------------------------------|----------------|-------------------------------|---|--|
| PA1 | <i>Observe access to main household.</i>                        |                                                                                                |                |                               | * |  |
|     |                                                                 |                                                                                                | Flat           | Flat land                     |   |  |
|     |                                                                 |                                                                                                | Steep          | Steep land                    |   |  |
| PA2 | <i>Observe if access is safe when path is wet.</i>              |                                                                                                |                |                               | * |  |
|     |                                                                 |                                                                                                | Safe           | Safe                          |   |  |
|     |                                                                 |                                                                                                | Not Safe       | Not safe                      |   |  |
|     |                                                                 |                                                                                                |                |                               |   |  |
|     |                                                                 |                                                                                                |                |                               |   |  |
| CD1 | Is your household registered in a Community Health Club?        |                                                                                                |                |                               | * |  |
|     |                                                                 |                                                                                                | Registered     | Yes, registered               |   |  |
|     |                                                                 |                                                                                                | Not Registered | No, not registered            |   |  |
| CD2 | If yes, is your CHC still active?                               |                                                                                                |                |                               | * |  |
|     |                                                                 |                                                                                                | Active         | Yes                           |   |  |
|     |                                                                 |                                                                                                | Not Active     | No                            |   |  |
| CD3 | When was the last meeting?                                      |                                                                                                |                |                               | * |  |
|     |                                                                 |                                                                                                | Week           | Within the last week          |   |  |
|     |                                                                 |                                                                                                | 2 Weeks        | Within the last two weeks     |   |  |
|     |                                                                 |                                                                                                | Month          | Within the last month         |   |  |
|     |                                                                 |                                                                                                | 3 Months       | Within the last 3 months      |   |  |
|     |                                                                 |                                                                                                | 6 months       | More than 6 months            |   |  |
|     |                                                                 |                                                                                                | Year           | More than a year              |   |  |
|     |                                                                 |                                                                                                | 2 Years        | More than 2 years             |   |  |
|     |                                                                 |                                                                                                | NA             | Cannot remember / Do not know |   |  |
| CD4 | May I see your membership card and certificate (if applicable)? | <i>Observe how many sessions have been completed at time of data collection. Enter number.</i> |                |                               | * |  |
|     |                                                                 |                                                                                                |                |                               |   |  |
|     |                                                                 |                                                                                                |                |                               |   |  |
| DH0 | What is the name of the head of the household?                  | Please write full first name and surname.                                                      |                |                               |   |  |
| DH1 | What is the religion of the head of the household?              |                                                                                                |                |                               | * |  |

|     |                                                         |                                                                                                                                               |                   |                                        |   |  |
|-----|---------------------------------------------------------|-----------------------------------------------------------------------------------------------------------------------------------------------|-------------------|----------------------------------------|---|--|
|     |                                                         |                                                                                                                                               | Christian         | Christian                              |   |  |
|     |                                                         |                                                                                                                                               | Moslem            | Moslem                                 |   |  |
|     |                                                         |                                                                                                                                               | Other             | Other                                  |   |  |
| DH2 | Total males in household.                               | <i>All males who regularly eat from the same pot. Enter number.</i>                                                                           |                   |                                        | * |  |
| DH3 | Total females in household.                             | <i>All females who regularly eat from the same pot. Enter number.</i>                                                                         |                   |                                        | * |  |
| DH4 | Total number of people in the household?                | <i>All household members (male and female) who regularly eat together from the same pot. Confirm that this is the total number of people.</i> |                   |                                        |   |  |
| DH5 | What gender is the respondent?                          | <i>If possible interview the 'main woman'. If there is no 'main woman' then interview the male head of household.</i>                         |                   |                                        | * |  |
|     |                                                         |                                                                                                                                               | Female            | Female                                 |   |  |
|     |                                                         |                                                                                                                                               | Male              | Male                                   |   |  |
| DH6 | What is the approximate age of the respondent in years? | <i>Enter "0" if not known. Leave empty if not willing to answer.</i>                                                                          |                   |                                        |   |  |
| DH7 | What is the level of education of the respondent?       |                                                                                                                                               |                   |                                        | * |  |
|     |                                                         |                                                                                                                                               | Some Primary      | Some primary school                    |   |  |
|     |                                                         |                                                                                                                                               | Primary           | Completed primary school               |   |  |
|     |                                                         |                                                                                                                                               | Some Secondary    | Some secondary school                  |   |  |
|     |                                                         |                                                                                                                                               | Secondary         | Completed secondary school             |   |  |
|     |                                                         |                                                                                                                                               | Further Education | Further education                      |   |  |
|     |                                                         |                                                                                                                                               | Training          | Other training                         |   |  |
|     |                                                         |                                                                                                                                               | None              | No education                           |   |  |
|     |                                                         |                                                                                                                                               | NA                | Not applicable / not willing to answer |   |  |
|     |                                                         |                                                                                                                                               |                   |                                        |   |  |
| ST6 | Does this household have children under 18 years old?   | <i>You will be asked to enter the number of children in the following questions. Enter 'No' if not applicable.</i>                            |                   |                                        | * |  |
|     |                                                         |                                                                                                                                               | Yes               | Yes                                    |   |  |
|     |                                                         |                                                                                                                                               | No                | No                                     |   |  |
| C1  | How many children are of 2 years or under?              | <i>If not applicable or no children in this age group enter "0".</i>                                                                          |                   |                                        | * |  |
| C2  | MUAC                                                    | <i>Measure the Upper Arm Circumference (MUAC) of one child between 0 - 2 years old.</i>                                                       |                   |                                        |   |  |
|     |                                                         |                                                                                                                                               | Green             | Green                                  |   |  |
|     |                                                         |                                                                                                                                               | Yellow            | Yellow                                 |   |  |

|      |                                                                                     |                                                                                                                 |        |                                                            |   |  |
|------|-------------------------------------------------------------------------------------|-----------------------------------------------------------------------------------------------------------------|--------|------------------------------------------------------------|---|--|
|      |                                                                                     |                                                                                                                 | Red    | Red                                                        |   |  |
|      |                                                                                     |                                                                                                                 | NA     | Not possible                                               |   |  |
| C3   | How many children between the ages of 3 – 5 years old?                              | <i>If not applicable or no children in this age group enter "0".</i>                                            |        |                                                            | * |  |
| C4   | MUAC                                                                                | <i>Measure the Upper Arm Circumference (MUAC) of one child between 3 - 5 years old.</i>                         |        |                                                            |   |  |
|      |                                                                                     |                                                                                                                 | Green  | Green                                                      |   |  |
|      |                                                                                     |                                                                                                                 | Yellow | Yellow                                                     |   |  |
|      |                                                                                     |                                                                                                                 | Red    | Red                                                        |   |  |
|      |                                                                                     |                                                                                                                 | NA     | Not possible                                               |   |  |
| C5   | What is the total number of children under 5 years old?                             | <i>Check that the number of children under 5 is correct. If not, go back and correct it.</i>                    |        |                                                            |   |  |
| C6   | What is the total number of children under 5 years old that are properly immunised? | <i>Ask to see the Road to Health Card and check to see if all children are immunised. If no card write '0'.</i> |        |                                                            | * |  |
| C7   | How many children are between 6 - 10 years old?                                     | <i>If not applicable or no children in this age group enter "0".</i>                                            |        |                                                            | * |  |
| C8   | How many children are between 11 - 18 years old?                                    | <i>If not applicable or no children in this age group enter "0".</i>                                            |        |                                                            | * |  |
| C9   | Total number of children under 18 years old                                         | <i>Check that the number of children under 18 is correct. If not, go back and correct it.</i>                   |        |                                                            |   |  |
| C10  | How many of these children are orphans?                                             | <i>If not applicable enter "0".</i>                                                                             |        |                                                            | * |  |
|      |                                                                                     |                                                                                                                 |        |                                                            |   |  |
|      |                                                                                     |                                                                                                                 |        |                                                            |   |  |
| G1H1 | 1 HOUSE TYPE                                                                        | <i>Observe the building materials used to construct the house / hut.</i>                                        |        |                                                            | * |  |
|      |                                                                                     |                                                                                                                 | 1      | Permanent house                                            |   |  |
|      |                                                                                     |                                                                                                                 | 2      | Burnt brick house                                          |   |  |
|      |                                                                                     |                                                                                                                 | 4      | Semi permanent house / Mud bricks/ hut                     |   |  |
|      |                                                                                     |                                                                                                                 | 8      | Mud / pole hut / house                                     |   |  |
|      |                                                                                     |                                                                                                                 | 16     | Shack                                                      |   |  |
| G1H2 | 2 ROOF                                                                              | <i>Observe the roofing materials.</i>                                                                           |        |                                                            | * |  |
|      |                                                                                     |                                                                                                                 | 1      | Permanent (Iron sheets / tiles) and ceiling / no holes     |   |  |
|      |                                                                                     |                                                                                                                 | 2      | Permanent (Iron sheets / tiles) no ceiling / holes in roof |   |  |
|      |                                                                                     |                                                                                                                 | 4      | Temporary (thatch) / some parts are iron / tiles           |   |  |

|      |                                                                           |                                                                                                                                                                                                                                                                                                             |           |                                                       |   |        |
|------|---------------------------------------------------------------------------|-------------------------------------------------------------------------------------------------------------------------------------------------------------------------------------------------------------------------------------------------------------------------------------------------------------|-----------|-------------------------------------------------------|---|--------|
|      |                                                                           |                                                                                                                                                                                                                                                                                                             | 8         | Temporary (thatch only)<br>good condition / no holes  |   | Yellow |
|      |                                                                           |                                                                                                                                                                                                                                                                                                             | 16        | Temporary (thatch only)<br>needs re-thatching / holes |   | Red    |
| G1H3 | 3 FLOOR                                                                   | <i>Ask the respondent if you can see inside the house and observe the floor.</i>                                                                                                                                                                                                                            |           |                                                       | * | Grey   |
|      |                                                                           |                                                                                                                                                                                                                                                                                                             | 1         | Cement / concrete                                     |   | Green  |
|      |                                                                           |                                                                                                                                                                                                                                                                                                             | 2         | Mud / cement patchy                                   |   | Green  |
|      |                                                                           |                                                                                                                                                                                                                                                                                                             | 4         | Mud with cement<br>smeared                            |   | Yellow |
|      |                                                                           |                                                                                                                                                                                                                                                                                                             | 8         | Mud with cow dung<br>smeared                          |   | Yellow |
|      |                                                                           |                                                                                                                                                                                                                                                                                                             | 16        | Only mud                                              |   | Red    |
| G1H4 | 4 WALLS                                                                   | <i>Observe the walls.</i>                                                                                                                                                                                                                                                                                   |           |                                                       | * | Grey   |
|      |                                                                           |                                                                                                                                                                                                                                                                                                             | 1         | Plastered with cement /<br>painted                    |   | Green  |
|      |                                                                           |                                                                                                                                                                                                                                                                                                             | 2         | Brick plastered                                       |   | Green  |
|      |                                                                           |                                                                                                                                                                                                                                                                                                             | 4         | Brick unplastered                                     |   | Yellow |
|      |                                                                           |                                                                                                                                                                                                                                                                                                             | 8         | Mud plastered                                         |   | Yellow |
|      |                                                                           |                                                                                                                                                                                                                                                                                                             | 16        | Tin / planks                                          |   | Red    |
| G1HX | Has the household<br>scored RED in any of the<br>Housing questions?       | If yes, then this<br>household is at<br>risk and needs<br>improvement.                                                                                                                                                                                                                                      | YES or NO |                                                       |   | Grey   |
| G1HY | Has the household<br>scored YELLOW in any<br>of the Housing<br>questions? | If yes, then this<br>household has<br>made progress<br>but needs<br>further<br>improvement.                                                                                                                                                                                                                 | YES or NO |                                                       |   | Grey   |
| G1HZ | HOUSING - LEVEL<br>ACHIEVED20/10/2<br>019: RED,<br>YELLOW or<br>GREEN     | The household has achieved the following score for this indicator.<br>If Red, household is at risk and needs to improve.<br>If Yellow, household has made progress but needs further improvement.<br>If Green, congratulate household as they have achieved excellent hygiene standards for this indicator. |           |                                                       |   | Grey   |
|      |                                                                           |                                                                                                                                                                                                                                                                                                             |           |                                                       |   |        |
|      |                                                                           |                                                                                                                                                                                                                                                                                                             |           |                                                       |   |        |
| G2C0 | COMPOUND<br>CASES                                                         | <i>Observe if household has its own compound.<br/>If yes, ask to be shown around and observe:<br/>Latrine, hand washing facility, shower / washroom, kitchen,<br/>cooking area, pot rack, livestock stalls, drainage,<br/>vegetables, fruit trees, any open defecation, animal dung.</i>                    |           |                                                       | * | Grey   |
|      |                                                                           |                                                                                                                                                                                                                                                                                                             | Yes       | Yes                                                   |   |        |
|      |                                                                           |                                                                                                                                                                                                                                                                                                             | Shared    | Shared                                                |   |        |
|      |                                                                           |                                                                                                                                                                                                                                                                                                             | No        | No                                                    |   |        |

|      |                         |                                                                                                                   |                                                                               |   |  |
|------|-------------------------|-------------------------------------------------------------------------------------------------------------------|-------------------------------------------------------------------------------|---|--|
| G2C1 | 1 WATER DRAINAGE        | <i>Observe how rainwater / grey (soapy) water and black water (livestock sludge) is drained around the house.</i> |                                                                               | * |  |
|      |                         | 1                                                                                                                 | Extensive drainage channelled into covered pit / tank / soakaway              |   |  |
|      |                         | 2                                                                                                                 | Extensive drainage channelled into open pit / plantation                      |   |  |
|      |                         | 4                                                                                                                 | Some drainage but not effective / standing grey water                         |   |  |
|      |                         | 8                                                                                                                 | Drainage into unsafe pit / standing black water                               |   |  |
|      |                         | 16                                                                                                                | No drainage / some erosion seen / standing rainwater in pot holes             |   |  |
| G2C2 | 2 GREENING              | <i>Observe the effort of beautification of the compound. If applicable select more than one.</i>                  |                                                                               | * |  |
|      |                         | 1                                                                                                                 | Flowers planted / pot plants                                                  |   |  |
|      |                         | 2                                                                                                                 | Shade trees / shrubs and hedges                                               |   |  |
|      |                         | 4                                                                                                                 | Compound covered with grass                                                   |   |  |
|      |                         | 8                                                                                                                 | Grass in patches                                                              |   |  |
|      |                         | 16                                                                                                                | No shade trees / shrubs and hedges                                            |   |  |
|      |                         | 32                                                                                                                | No effort                                                                     |   |  |
| G2C3 | 3 SOLID WASTE: SWEEPING | <i>Observe if the area around the house is well swept.</i>                                                        |                                                                               | * |  |
|      |                         | 1                                                                                                                 | Completely swept                                                              |   |  |
|      |                         | 2                                                                                                                 | Well swept                                                                    |   |  |
|      |                         | 4                                                                                                                 | Swept in some places                                                          |   |  |
|      |                         | 8                                                                                                                 | Very little sweeping                                                          |   |  |
|      |                         | 16                                                                                                                | No sweeping                                                                   |   |  |
| G2C4 | 4 SOLID WASTE: TYPE     | <i>Observe what type of waste is thrown around the house.</i>                                                     |                                                                               | * |  |
|      |                         | 1                                                                                                                 | No waste of any kind seen in yard                                             |   |  |
|      |                         | 2                                                                                                                 | Very little waste of any kind seen in yard                                    |   |  |
|      |                         | 4                                                                                                                 | Some rotten vegetable waste seen, a few papers                                |   |  |
|      |                         | 8                                                                                                                 | Rotten vegetable waste, plus some paper, plastic, bottles / tins lying around |   |  |
|      |                         | 16                                                                                                                | A lot of rotten vegetable waste, and a lot of paper, plastic, tins & bottles  |   |  |

|      |                                                                   |                                                                                                                                                                                                                                                                                                                 |           |                                                                    |   |  |
|------|-------------------------------------------------------------------|-----------------------------------------------------------------------------------------------------------------------------------------------------------------------------------------------------------------------------------------------------------------------------------------------------------------|-----------|--------------------------------------------------------------------|---|--|
| G2C5 | 5 SOLID WASTE MANAGEMENT                                          | <i>Observe how solid waste is disposed.</i>                                                                                                                                                                                                                                                                     |           |                                                                    | * |  |
|      |                                                                   |                                                                                                                                                                                                                                                                                                                 | 1         | Municipal garbage collection service                               |   |  |
|      |                                                                   |                                                                                                                                                                                                                                                                                                                 | 2         | Solid waste separated / recycled in different ways                 |   |  |
|      |                                                                   |                                                                                                                                                                                                                                                                                                                 | 4         | Solid waste disposed in dedicated area: pit / fenced / roofed area |   |  |
|      |                                                                   |                                                                                                                                                                                                                                                                                                                 | 8         | Some attempt at disposal in dedicated area and managed / burnt     |   |  |
|      |                                                                   |                                                                                                                                                                                                                                                                                                                 | 16        | Some attempt at disposal in dedicated area but NOT managed / burnt |   |  |
|      |                                                                   |                                                                                                                                                                                                                                                                                                                 | 32        | No attempt at solid waste disposal                                 |   |  |
| G2CX | Has the household scored RED in any of the Compound questions?    | If yes, then this household is at risk and needs improvement.                                                                                                                                                                                                                                                   | YES or NO |                                                                    |   |  |
| G2CY | Has the household scored YELLOW in any of the Compound questions? | If yes, then this household has made progress but needs further improvement.                                                                                                                                                                                                                                    | YES or NO |                                                                    |   |  |
| G2CZ | COMPOUND - LEVEL ACHIEVED: RED, YELLOW or GREEN                   | The household has achieved the following score for this indicator.<br>If Red, household is at risk and needs to improve.<br>If Yellow, household has made progress but needs further improvement.<br>If Green, congratulate household as they have achieved excellent hygiene standards for this indicator.G195 |           |                                                                    |   |  |
|      |                                                                   |                                                                                                                                                                                                                                                                                                                 |           |                                                                    |   |  |
|      |                                                                   |                                                                                                                                                                                                                                                                                                                 |           |                                                                    |   |  |
| G3W0 | WATER SOURCE CASES                                                | <i>Is this household connected to the piped water supply by the Municipality or Council? Observe and ask.</i>                                                                                                                                                                                                   |           |                                                                    | * |  |
|      |                                                                   |                                                                                                                                                                                                                                                                                                                 | Yes       | Yes                                                                |   |  |
|      |                                                                   |                                                                                                                                                                                                                                                                                                                 | No        | No                                                                 |   |  |
| G3W1 | 1 TYPE - What is your primary water source?                       | <i>Observe and ask.</i>                                                                                                                                                                                                                                                                                         |           |                                                                    | * |  |
|      |                                                                   |                                                                                                                                                                                                                                                                                                                 | 1         | Safe piped water / tap / tank                                      |   |  |
|      |                                                                   |                                                                                                                                                                                                                                                                                                                 | 2         | Water kiosk                                                        |   |  |
|      |                                                                   |                                                                                                                                                                                                                                                                                                                 | 4         | Borehole / hand pump                                               |   |  |
|      |                                                                   |                                                                                                                                                                                                                                                                                                                 | 8         | Protected spring                                                   |   |  |
|      |                                                                   |                                                                                                                                                                                                                                                                                                                 | 16        | Protected well                                                     |   |  |
|      |                                                                   |                                                                                                                                                                                                                                                                                                                 | 32        | Protected tank                                                     |   |  |
|      |                                                                   |                                                                                                                                                                                                                                                                                                                 | 64        | Protected rainwater tank                                           |   |  |



|      |                                                                                                |                                                                                         |      |                                                          |   |  |
|------|------------------------------------------------------------------------------------------------|-----------------------------------------------------------------------------------------|------|----------------------------------------------------------|---|--|
|      |                                                                                                |                                                                                         | 128  | Contaminated borehole                                    |   |  |
|      |                                                                                                |                                                                                         | 256  | Unprotected open well                                    |   |  |
|      |                                                                                                |                                                                                         | 512  | Unprotected spring                                       |   |  |
|      |                                                                                                |                                                                                         | 1024 | Open rainwater tank                                      |   |  |
|      |                                                                                                |                                                                                         | 2048 | River, stream, dam, rain puddles                         |   |  |
| G3W2 | <b>2 RELIABILITY - Is your selected primary source reliable all year round?</b>                | Ask.                                                                                    |      |                                                          | * |  |
|      |                                                                                                |                                                                                         | 1    | Water supply all year                                    |   |  |
|      |                                                                                                |                                                                                         | 2    | Slow recharge occasional shortage / low water table      |   |  |
|      |                                                                                                |                                                                                         | 4    | Shortage in dry season, no safe alternative              |   |  |
|      |                                                                                                |                                                                                         | 8    | Water supply cut off / out of order, no safe alternative |   |  |
| G3W3 | <b>3 DISTANCE TO WATER SOURCE - How long does it take to walk to the water source one way?</b> | Ask.                                                                                    |      |                                                          | * |  |
|      |                                                                                                |                                                                                         | 1    | None / water source in compound                          |   |  |
|      |                                                                                                |                                                                                         | 2    | Less than quarter of an hour                             |   |  |
|      |                                                                                                |                                                                                         | 4    | Half an hour or less                                     |   |  |
|      |                                                                                                |                                                                                         | 8    | More than half an hour                                   |   |  |
|      |                                                                                                |                                                                                         | 16   | More than an hour                                        |   |  |
| G3W4 | <b>4 WAITING TIME AT WATER SOURCE - How long does it take to queue for water?</b>              | Ask.                                                                                    |      |                                                          | * |  |
|      |                                                                                                |                                                                                         | 1    | No waiting time                                          |   |  |
|      |                                                                                                |                                                                                         | 2    | Less than quarter of an hour                             |   |  |
|      |                                                                                                |                                                                                         | 4    | Half an hour or less                                     |   |  |
|      |                                                                                                |                                                                                         | 8    | More than half an hour                                   |   |  |
|      |                                                                                                |                                                                                         | 16   | More than an hour                                        |   |  |
| G3W5 | <b>5 AMOUNT COLLECTED - How many liters of water are collected by the household daily?</b>     | For example: 1 container = 20 liters                                                    |      |                                                          | * |  |
| G3W6 | Total litres per household member per day.                                                     | <i>This calculation shows the amount of water per person in the household each day.</i> |      |                                                          | * |  |

|      |                                                                         |                                                                                                                                                                                                                                                                                                                                                  |           |                                                      |  |
|------|-------------------------------------------------------------------------|--------------------------------------------------------------------------------------------------------------------------------------------------------------------------------------------------------------------------------------------------------------------------------------------------------------------------------------------------|-----------|------------------------------------------------------|--|
| G3W7 | Enough water per household member each day?                             | <i>Green = More than 15 liters. Yellow = 15 liters. Red = less than 15 liters.</i>                                                                                                                                                                                                                                                               |           | *                                                    |  |
|      |                                                                         |                                                                                                                                                                                                                                                                                                                                                  | GREEN     |                                                      |  |
|      |                                                                         |                                                                                                                                                                                                                                                                                                                                                  | YELLOW    |                                                      |  |
|      |                                                                         |                                                                                                                                                                                                                                                                                                                                                  | RED       |                                                      |  |
| G3WX | Has the household scored RED in any of the Water Source questions?      | If yes, then this household is at risk and needs improvement.                                                                                                                                                                                                                                                                                    | YES or NO |                                                      |  |
| G3WY | Has the household scored YELLOW in any of the Water Source questions?   | If yes, then this household has made progress but needs further improvement.                                                                                                                                                                                                                                                                     | YES or NO |                                                      |  |
| G3WZ | <b>WATER SOURCE - LEVEL ACHIEVED: RED, YELLOW or GREEN</b>              | <i>The household has achieved the following score for this indicator.<br/>         If Red, household is at risk and needs to improve.<br/>         If Yellow, household has made progress but needs further improvement.<br/>         If Green, congratulate household as they have achieved excellent hygiene standards for this indicator.</i> |           |                                                      |  |
|      |                                                                         |                                                                                                                                                                                                                                                                                                                                                  |           |                                                      |  |
|      |                                                                         |                                                                                                                                                                                                                                                                                                                                                  |           |                                                      |  |
| G4D0 | <b>DRINKING WATER STORAGE CASES - Do you store your drinking water?</b> | <i>Observe the drinking water.</i>                                                                                                                                                                                                                                                                                                               |           | *                                                    |  |
|      |                                                                         |                                                                                                                                                                                                                                                                                                                                                  | Yes       | Yes                                                  |  |
|      |                                                                         |                                                                                                                                                                                                                                                                                                                                                  | No        | No                                                   |  |
|      |                                                                         |                                                                                                                                                                                                                                                                                                                                                  |           |                                                      |  |
| G4D1 | <b>1 DRINKING WATER STORAGE</b>                                         | <i>Observe how the drinking water is stored.</i>                                                                                                                                                                                                                                                                                                 |           | *                                                    |  |
|      |                                                                         |                                                                                                                                                                                                                                                                                                                                                  | 1         | Stored in water filter                               |  |
|      |                                                                         |                                                                                                                                                                                                                                                                                                                                                  | 2         | Bottled drinking water purchased                     |  |
|      |                                                                         |                                                                                                                                                                                                                                                                                                                                                  | 4         | Stored in covered bucket / closed jerry can          |  |
|      |                                                                         |                                                                                                                                                                                                                                                                                                                                                  | 8         | Stored in poorly covered bucket / clay pot / other   |  |
|      |                                                                         |                                                                                                                                                                                                                                                                                                                                                  | 16        | Stored in open / uncovered bucket / clay pot / other |  |
| G4D2 | <b>2 HYGIENE</b>                                                        | <i>Observe cleanliness of drinking water container.</i>                                                                                                                                                                                                                                                                                          |           | *                                                    |  |
|      |                                                                         |                                                                                                                                                                                                                                                                                                                                                  | 1         | Very clean inside and outside                        |  |
|      |                                                                         |                                                                                                                                                                                                                                                                                                                                                  | 2         | Quite clean inside and outside                       |  |
|      |                                                                         |                                                                                                                                                                                                                                                                                                                                                  | 4         | Quite clean inside and dirty outside                 |  |

|      |                                                                                 |                                                                                                                                                                                                                                                                                                             |           |                                                            |   |        |
|------|---------------------------------------------------------------------------------|-------------------------------------------------------------------------------------------------------------------------------------------------------------------------------------------------------------------------------------------------------------------------------------------------------------|-----------|------------------------------------------------------------|---|--------|
|      |                                                                                 |                                                                                                                                                                                                                                                                                                             | 8         | Dirty and algae inside, but stored inside the house        |   | Red    |
|      |                                                                                 |                                                                                                                                                                                                                                                                                                             | 16        | Very dirty inside and left outside                         |   | Red    |
| G4D3 | <b>3 TREATMENT - Do you treat your drinking water?</b>                          | Observe and ask.                                                                                                                                                                                                                                                                                            |           |                                                            | * | Grey   |
|      |                                                                                 |                                                                                                                                                                                                                                                                                                             | 1         | Well boiled                                                |   | Green  |
|      |                                                                                 |                                                                                                                                                                                                                                                                                                             | 2         | Solar                                                      |   | Green  |
|      |                                                                                 |                                                                                                                                                                                                                                                                                                             | 4         | Chemically Sur L'eau /Jik and / or filter                  |   | Green  |
|      |                                                                                 |                                                                                                                                                                                                                                                                                                             | 8         | Some of the above                                          |   | Green  |
|      |                                                                                 |                                                                                                                                                                                                                                                                                                             | 16        | Not treated as water is said to be from safe source        |   | Yellow |
|      |                                                                                 |                                                                                                                                                                                                                                                                                                             | 32        | None of the above / although water is unsafe               |   | Red    |
| G4D4 | <b>4 USAGE - Please can you give me a drink of water?</b>                       | <i>Observe how drinking water is served.</i>                                                                                                                                                                                                                                                                |           |                                                            | * | Grey   |
|      |                                                                                 |                                                                                                                                                                                                                                                                                                             | 1         | Poured straight from filter / container / tap              |   | Green  |
|      |                                                                                 |                                                                                                                                                                                                                                                                                                             | 2         | Taken with a jug / ladle                                   |   | Green  |
|      |                                                                                 |                                                                                                                                                                                                                                                                                                             | 4         | Take with a cup and put into another cup to drink          |   | Green  |
|      |                                                                                 |                                                                                                                                                                                                                                                                                                             | 8         | Taken with a cup and consumed with the same cup            |   | Yellow |
|      |                                                                                 |                                                                                                                                                                                                                                                                                                             | 16        | Taken and consumed directly by hand / drink from container |   | Red    |
| G4D5 | <b>5 OBSERVE POINT OF USE WATER CLARITY</b>                                     | <i>Observe the water clarity.</i>                                                                                                                                                                                                                                                                           |           |                                                            | * | Grey   |
|      |                                                                                 |                                                                                                                                                                                                                                                                                                             | 1         | Very safe: very clear                                      |   | Green  |
|      |                                                                                 |                                                                                                                                                                                                                                                                                                             | 2         | Safe: looks quite clear                                    |   | Yellow |
|      |                                                                                 |                                                                                                                                                                                                                                                                                                             | 4         | Dangerous: turbid, muddy                                   |   | Red    |
| G4DX | Has the household scored RED in any of the Drinking Water Storage questions?    | If yes, then this household is at risk and needs improvement.                                                                                                                                                                                                                                               | YES or NO |                                                            |   | Grey   |
| G4DY | Has the household scored YELLOW in any of the Drinking Water Storage questions? | If yes, then this household has made progress but needs further improvement.                                                                                                                                                                                                                                | YES or NO |                                                            |   | Grey   |
| G4DZ | <b>DRINKING WATER STORAGE - LEVEL ACHIEVED: RED, YELLOW or GREEN</b>            | The household has achieved the following score for this indicator.<br>If Red, household is at risk and needs to improve.<br>If Yellow, household has made progress but needs further improvement.<br>If Green, congratulate household as they have achieved excellent hygiene standards for this indicator. |           |                                                            |   | Grey   |
|      |                                                                                 |                                                                                                                                                                                                                                                                                                             |           |                                                            |   | Black  |

| G5HW1 | 1 HAND WASHING - METHOD          | <i>If any children present, ask them to wash their hands. If not, ask respondent.</i> |     |                                                                                  | * |  |
|-------|----------------------------------|---------------------------------------------------------------------------------------|-----|----------------------------------------------------------------------------------|---|--|
|       |                                  |                                                                                       | 1   | Excellent: rub each finger for long time (about 30 seconds) and nails, soap used |   |  |
|       |                                  |                                                                                       | 2   | Good: hands rubbed well, soap used                                               |   |  |
|       |                                  |                                                                                       | 4   | Average: quick wash, soap used                                                   |   |  |
|       |                                  |                                                                                       | 8   | Poor: reuse of water in a bowl, no soap used                                     |   |  |
|       |                                  |                                                                                       | 16  | Very bad: shared bowl of used water, no soap                                     |   |  |
|       |                                  |                                                                                       | 32  | No hand washing practised                                                        |   |  |
| G5HW2 | 2 PLACE                          | <i>Observe where hand washing facilities are.</i>                                     |     |                                                                                  | * |  |
|       |                                  |                                                                                       | 1   | Hand washing facility by kitchen and toilet or more                              |   |  |
|       |                                  |                                                                                       | 2   | Hand washing facility by toilet                                                  |   |  |
|       |                                  |                                                                                       | 4   | Hand washing facility in home (basin / jug)                                      |   |  |
|       |                                  |                                                                                       | 8   | No fixed place for hand washing facility                                         |   |  |
|       |                                  |                                                                                       | 16  | No hand wash facilities at all                                                   |   |  |
| G5HW3 | 3 HAND WASH FACILITY DESIGN      | <i>Observe the type of hand washing facility.</i>                                     |     |                                                                                  | * |  |
|       |                                  |                                                                                       | 1   | Tap                                                                              |   |  |
|       |                                  |                                                                                       | 2   | Step & Wash / Canacla                                                            |   |  |
|       |                                  |                                                                                       | 4   | Permanent (manufactured)                                                         |   |  |
|       |                                  |                                                                                       | 8   | Temporary (homemade Tippy tap)                                                   |   |  |
|       |                                  |                                                                                       | 16  | Pour to waste over basin                                                         |   |  |
|       |                                  |                                                                                       | 32  | Jerry can                                                                        |   |  |
|       |                                  |                                                                                       | 64  | Plastic bottle                                                                   |   |  |
|       |                                  |                                                                                       | 128 | Common bowl                                                                      |   |  |
| G5HW4 | 4 USAGE OF HAND WASHING FACILITY | <i>Observe if they are used.</i>                                                      |     |                                                                                  | * |  |
|       |                                  |                                                                                       | 1   | In use / filled with water                                                       |   |  |
|       |                                  |                                                                                       | 2   | Evidence of use but not with water                                               |   |  |
|       |                                  |                                                                                       | 4   | Broken / no water                                                                |   |  |

|       |                                                                                                                  |                                                                                                                                                                                                                                                                                                                          |           |                                                                 |   |  |
|-------|------------------------------------------------------------------------------------------------------------------|--------------------------------------------------------------------------------------------------------------------------------------------------------------------------------------------------------------------------------------------------------------------------------------------------------------------------|-----------|-----------------------------------------------------------------|---|--|
| G5HW5 | 5 AVAILABILITY OF SOAP / ASH                                                                                     | <i>Observe if there is soap present.</i>                                                                                                                                                                                                                                                                                 |           |                                                                 | * |  |
|       |                                                                                                                  |                                                                                                                                                                                                                                                                                                                          | 1         | Soap at hand washing facility and used                          |   |  |
|       |                                                                                                                  |                                                                                                                                                                                                                                                                                                                          | 2         | Ash at hand washing facility and used                           |   |  |
|       |                                                                                                                  |                                                                                                                                                                                                                                                                                                                          | 4         | Soap / ash available in house, but not at hand washing facility |   |  |
|       |                                                                                                                  |                                                                                                                                                                                                                                                                                                                          | 8         | No soap seen, but say they usually use soap                     |   |  |
|       |                                                                                                                  |                                                                                                                                                                                                                                                                                                                          | 16        | No soap available / ash not used                                |   |  |
| G5HWX | Has the household scored RED in any of the Hand Washing questions?                                               | If yes, then this household is at risk and needs improvement.                                                                                                                                                                                                                                                            | YES or NO |                                                                 |   |  |
| G5HWY | Has the household scored YELLOW in any of the Hand Washing questions?                                            | If yes, then this household has made progress but needs further improvement.                                                                                                                                                                                                                                             | YES or NO |                                                                 |   |  |
| G5HWZ | RED, YELLOW or GREEN                                                                                             | <i>The household has achieved the following score for this indicator.<br/> If Red, household is at risk and needs to improve.<br/> If Yellow, household has made progress but needs further improvement.<br/> If Green, congratulate household as they have achieved excellent hygiene standards for this indicator.</i> |           |                                                                 |   |  |
|       |                                                                                                                  |                                                                                                                                                                                                                                                                                                                          |           |                                                                 |   |  |
|       |                                                                                                                  |                                                                                                                                                                                                                                                                                                                          |           |                                                                 |   |  |
| G6S0  | SANITATION CASES - Do you have access to a latrine (dug hole in the ground) or a toilet (manufactured facility)? | <i>Observe and ask.</i>                                                                                                                                                                                                                                                                                                  |           |                                                                 | * |  |
|       |                                                                                                                  |                                                                                                                                                                                                                                                                                                                          | Yes       | Yes                                                             |   |  |
|       |                                                                                                                  |                                                                                                                                                                                                                                                                                                                          | No        | No                                                              |   |  |
| G6S1  | 1 LATRINE OWNERSHIP - Is the latrine used only by your own family?                                               | <i>Observe and ask.</i>                                                                                                                                                                                                                                                                                                  |           |                                                                 | * |  |
|       |                                                                                                                  |                                                                                                                                                                                                                                                                                                                          | 1         | Own latrine / toilet                                            |   |  |
|       |                                                                                                                  |                                                                                                                                                                                                                                                                                                                          | 2         | Communal ablution                                               |   |  |
|       |                                                                                                                  |                                                                                                                                                                                                                                                                                                                          | 4         | Shared latrine / toilet with neighbour                          |   |  |
| G6S2  | 2 LATRINE TYPE                                                                                                   | <i>Determine the type of latrine / toilet.</i>                                                                                                                                                                                                                                                                           |           |                                                                 | * |  |
|       |                                                                                                                  |                                                                                                                                                                                                                                                                                                                          | 1         | Water closet / WC (Flush toilet connected to sewer/soak away)   |   |  |
|       |                                                                                                                  |                                                                                                                                                                                                                                                                                                                          | 2         | Pour Flush Toilet (water used to seal toilet)                   |   |  |
|       |                                                                                                                  |                                                                                                                                                                                                                                                                                                                          | 4         | EcoSan latrine (urine separation or diversion / dry)            |   |  |

|             |                                                                  |                                                                             |           |                                                                                       |   |  |
|-------------|------------------------------------------------------------------|-----------------------------------------------------------------------------|-----------|---------------------------------------------------------------------------------------|---|--|
|             |                                                                  |                                                                             | 8         | Ventilated Improved Pit latrine VIP (permanent)                                       |   |  |
|             |                                                                  |                                                                             | 16        | Permanent covered pit latrine (PCP) (permanent slab / sanplat / cover/ walls / floor) |   |  |
|             |                                                                  |                                                                             | 32        | Ventilated Improved Pit Latrine (temporary, local materials)                          |   |  |
|             |                                                                  |                                                                             | 64        | Pit latrine with cement slab or sanplat (no cover)                                    |   |  |
|             |                                                                  |                                                                             | 128       | Traditional pit with floor of logs / mud (with cover)                                 |   |  |
|             |                                                                  |                                                                             | 256       | Traditional pit with floor of logs / mud (no cover)                                   |   |  |
| <b>G6S3</b> | <b>3 NO LATRINE</b>                                              | <i>If no latrine present, observe what type of sanitation is practised.</i> |           |                                                                                       | * |  |
|             |                                                                  |                                                                             | 1         | Cat sanitation                                                                        |   |  |
|             |                                                                  |                                                                             | 2         | Recycling (biodegradable sealed bag)                                                  |   |  |
|             |                                                                  |                                                                             | 4         | Flying toilet (plastic bag)                                                           |   |  |
|             |                                                                  |                                                                             | 8         | Open defecation (adults / children)                                                   |   |  |
|             |                                                                  |                                                                             | 16        | Toddlers faeces left lying without disposal in latrine                                |   |  |
| <b>G6S4</b> | <b>4 PIT LATRINE FLY CONTROL</b>                                 | <i>Observe if flies are controlled properly.</i>                            |           |                                                                                       | * |  |
|             |                                                                  |                                                                             | 1         | Use of ventilation pipe (working) on latrine pit                                      |   |  |
|             |                                                                  |                                                                             | 2         | Pit latrine with well fitted cover                                                    |   |  |
|             |                                                                  |                                                                             | 4         | Latrine lid is quite well fitted but there are still flies                            |   |  |
|             |                                                                  |                                                                             | 8         | Use of ventilation pipe but broken / no gauze                                         |   |  |
|             |                                                                  |                                                                             | 16        | Pit latrine with poorly fitted cover                                                  |   |  |
|             |                                                                  |                                                                             | 32        | Pit latrine with cover but not used                                                   |   |  |
| <b>G6S5</b> | <b>5 CLEANLINESS</b>                                             | <i>Observe the cleanliness of the latrine.</i>                              |           |                                                                                       | * |  |
|             |                                                                  |                                                                             | 1         | Very Good: hygienic (no smell, urine, faeces nor flies seen)                          |   |  |
|             |                                                                  |                                                                             | 2         | Good: No faeces, urine nor flies seen                                                 |   |  |
|             |                                                                  |                                                                             | 4         | Average: No faeces nor urine, but smelly                                              |   |  |
|             |                                                                  |                                                                             | 8         | Bad: Smelly, urine only / flies                                                       |   |  |
|             |                                                                  |                                                                             | 16        | Very bad: Smelly, very dirty, faeces / urine / flies                                  |   |  |
| <b>G6SX</b> | Has the household scored RED in any of the Sanitation questions? | If yes, then this household is at risk and needs improvement.               | YES or NO |                                                                                       |   |  |

|             |                                                                     |                                                                                                                                                                                                                                                                                                                          |           |                                                         |   |  |
|-------------|---------------------------------------------------------------------|--------------------------------------------------------------------------------------------------------------------------------------------------------------------------------------------------------------------------------------------------------------------------------------------------------------------------|-----------|---------------------------------------------------------|---|--|
| <b>G6SY</b> | Has the household scored YELLOW in any of the Sanitation questions? | If yes, then this household has made progress but needs further improvement.                                                                                                                                                                                                                                             | YES or NO |                                                         |   |  |
| <b>G6SZ</b> | <b>RED, YELLOW or GREEN</b>                                         | <i>The household has achieved the following score for this indicator.<br/> If Red, household is at risk and needs to improve.<br/> If Yellow, household has made progress but needs further improvement.<br/> If Green, congratulate household as they have achieved excellent hygiene standards for this indicator.</i> |           |                                                         |   |  |
|             |                                                                     |                                                                                                                                                                                                                                                                                                                          |           |                                                         |   |  |
|             |                                                                     |                                                                                                                                                                                                                                                                                                                          |           |                                                         |   |  |
| <b>G7B1</b> | <b>1 PLACE FOR BODY WASHING</b>                                     | <i>Observe the wash place.</i>                                                                                                                                                                                                                                                                                           |           |                                                         | * |  |
|             |                                                                     |                                                                                                                                                                                                                                                                                                                          | 1         | Private wash room in house                              |   |  |
|             |                                                                     |                                                                                                                                                                                                                                                                                                                          | 2         | Permanent wash room outside                             |   |  |
|             |                                                                     |                                                                                                                                                                                                                                                                                                                          | 4         | Temporary wash shelter outside                          |   |  |
|             |                                                                     |                                                                                                                                                                                                                                                                                                                          | 8         | Wash place outside but no privacy                       |   |  |
|             |                                                                     |                                                                                                                                                                                                                                                                                                                          | 16        | No evidence of washing at home                          |   |  |
| <b>G7B2</b> | <b>2 USE SOAP FOR BODY</b>                                          | <i>Observe if there is soap at the wash place.</i>                                                                                                                                                                                                                                                                       |           |                                                         | * |  |
|             |                                                                     |                                                                                                                                                                                                                                                                                                                          | 1         | Soap at wash place                                      |   |  |
|             |                                                                     |                                                                                                                                                                                                                                                                                                                          | 2         | Soap available but not at wash place                    |   |  |
|             |                                                                     |                                                                                                                                                                                                                                                                                                                          | 4         | No soap seen, but they say they use soap                |   |  |
|             |                                                                     |                                                                                                                                                                                                                                                                                                                          | 8         | No soap available                                       |   |  |
| <b>G7B3</b> | <b>3 CLOTHING CLEANLINESS</b>                                       | <i>Observe the state of adults' clothes.</i>                                                                                                                                                                                                                                                                             |           |                                                         | * |  |
|             |                                                                     |                                                                                                                                                                                                                                                                                                                          | 1         | Adults in clean clothes                                 |   |  |
|             |                                                                     |                                                                                                                                                                                                                                                                                                                          | 2         | Adults in fairly clean clothes                          |   |  |
|             |                                                                     |                                                                                                                                                                                                                                                                                                                          | 4         | Adults in dirty clothes                                 |   |  |
| <b>G7B4</b> | <b>4 BEDROOM TIDYNESS</b>                                           | <i>Observe if the bedroom is tidy, ie if clothes are stored in cupboard or container and not left on the floor.</i>                                                                                                                                                                                                      |           |                                                         | * |  |
|             |                                                                     |                                                                                                                                                                                                                                                                                                                          | 1         | The bedrooms are tidy, clothes are well stored          |   |  |
|             |                                                                     |                                                                                                                                                                                                                                                                                                                          | 2         | The bedrooms are quite tidy, some clothes left around   |   |  |
|             |                                                                     |                                                                                                                                                                                                                                                                                                                          | 4         | The bedrooms are very disorderly with no clothes stored |   |  |
|             |                                                                     |                                                                                                                                                                                                                                                                                                                          | 8         | Only mats for sleeping / clothes very badly stored      |   |  |
| <b>G7B5</b> | <b>5 BED FACILITIES</b>                                             | <i>Observe the sleeping facilities.</i>                                                                                                                                                                                                                                                                                  |           |                                                         | * |  |

|             |                                                                                                  |                                                                                                                                                                                                                                                                                                                       |           |                                            |  |   |  |
|-------------|--------------------------------------------------------------------------------------------------|-----------------------------------------------------------------------------------------------------------------------------------------------------------------------------------------------------------------------------------------------------------------------------------------------------------------------|-----------|--------------------------------------------|--|---|--|
|             |                                                                                                  |                                                                                                                                                                                                                                                                                                                       | 1         | Beds with mattresses                       |  |   |  |
|             |                                                                                                  |                                                                                                                                                                                                                                                                                                                       | 2         | Mats on floor                              |  |   |  |
|             |                                                                                                  |                                                                                                                                                                                                                                                                                                                       | 4         | Blankets on the floor                      |  |   |  |
| <b>G7BX</b> | Has the household scored RED in any of the Body Hygiene questions?                               | If yes, then this household is at risk and needs improvement.                                                                                                                                                                                                                                                         | YES or NO |                                            |  |   |  |
| <b>G7BY</b> | Has the household scored YELLOW in any of the Body Hygiene questions?                            | If yes, then this household has made progress but needs further improvement.                                                                                                                                                                                                                                          | YES or NO |                                            |  |   |  |
| <b>G7BZ</b> | <b>RED, YELLOW or GREEN</b>                                                                      | <i>The household has achieved the following score for this indicator.<br/>If Red, household is at risk and needs to improve.<br/>If Yellow, household has made progress but needs further improvement.<br/>If Green, congratulate household as they have achieved excellent hygiene standards for this indicator.</i> |           |                                            |  |   |  |
|             |                                                                                                  |                                                                                                                                                                                                                                                                                                                       |           |                                            |  |   |  |
|             |                                                                                                  |                                                                                                                                                                                                                                                                                                                       |           |                                            |  |   |  |
|             |                                                                                                  |                                                                                                                                                                                                                                                                                                                       |           |                                            |  |   |  |
|             |                                                                                                  |                                                                                                                                                                                                                                                                                                                       |           |                                            |  |   |  |
| <b>G8M0</b> | <b>MALARIA PROTECTION CASES - Has any member of your household had malaria in the last year?</b> | Ask.                                                                                                                                                                                                                                                                                                                  |           |                                            |  | * |  |
|             |                                                                                                  |                                                                                                                                                                                                                                                                                                                       | No        | No                                         |  |   |  |
|             |                                                                                                  |                                                                                                                                                                                                                                                                                                                       | Yes       | Yes                                        |  |   |  |
| <b>G8M1</b> | <b>1 PROTECTION METHOD - What do you use to prevent malaria?</b>                                 | <i>Select more than one method if applicable.</i>                                                                                                                                                                                                                                                                     |           |                                            |  | * |  |
|             |                                                                                                  |                                                                                                                                                                                                                                                                                                                       | 1         | Malaria prophylaxis                        |  |   |  |
|             |                                                                                                  |                                                                                                                                                                                                                                                                                                                       | 2         | Mosquito bed nets                          |  |   |  |
|             |                                                                                                  |                                                                                                                                                                                                                                                                                                                       | 4         | Netting on window                          |  |   |  |
|             |                                                                                                  |                                                                                                                                                                                                                                                                                                                       | 8         | Insecticide spray / lotion                 |  |   |  |
|             |                                                                                                  |                                                                                                                                                                                                                                                                                                                       | 16        | Mosquito coils / electric insecticide pads |  |   |  |
|             |                                                                                                  |                                                                                                                                                                                                                                                                                                                       | 32        | Burn animal dung or other local methods    |  |   |  |
|             |                                                                                                  |                                                                                                                                                                                                                                                                                                                       | 64        | Nothing done to prevent malaria            |  |   |  |



|       |                                                                                                              |                         |                     |                                                     |   |        |
|-------|--------------------------------------------------------------------------------------------------------------|-------------------------|---------------------|-----------------------------------------------------|---|--------|
| G8M1A | Calculate trafficlight based on the combination selected in Protection Method.                               |                         | Red Green or Yellow |                                                     |   |        |
| G8M2  | <b>2 USERS - Who uses mosquito nets?</b>                                                                     | <i>Observe and ask.</i> |                     |                                                     | * |        |
|       |                                                                                                              |                         | 1                   | Everyone - adults and children                      |   | Green  |
|       |                                                                                                              |                         | 2                   | Only children                                       |   | Yellow |
|       |                                                                                                              |                         | 4                   | Only adults                                         |   | Red    |
| G8M3  | <b>3 MOSQUITO NETS - Are the mosquito nets effective?</b>                                                    | <i>Observe and ask.</i> |                     |                                                     | * |        |
|       |                                                                                                              |                         | 1                   | Long lasting insecticide treated nets (LLITN)       |   | Green  |
|       |                                                                                                              |                         | 2                   | Insecticide treated net (ITN)                       |   | Green  |
|       |                                                                                                              |                         | 4                   | Non-treated net                                     |   | Yellow |
|       |                                                                                                              |                         | 8                   | Good condition – no holes                           |   | Yellow |
|       |                                                                                                              |                         | 16                  | Poor condition but repaired                         |   | Red    |
|       |                                                                                                              |                         | 32                  | Net with holes / not repaired                       |   | Red    |
| G8M4  | <b>4 BREEDING SITE CONTROL - Do you prevent mosquito breeding sites in any way?</b>                          | <i>Observe and ask.</i> |                     |                                                     | * |        |
|       |                                                                                                              |                         | 1                   | Multiple prevention methods used                    |   | Green  |
|       |                                                                                                              |                         | 2                   | Emptying pot holes and tins/ drain standing water   |   | Yellow |
|       |                                                                                                              |                         | 4                   | Cutting bush around house                           |   | Yellow |
|       |                                                                                                              |                         | 8                   | Application of oils on stagnant water surfaces      |   | Yellow |
|       |                                                                                                              |                         | 16                  | Other traditional                                   |   | Yellow |
|       |                                                                                                              |                         | 32                  | Nothing done                                        |   | Red    |
| G8M5  | <b>5 REPORTING - Have you reported any malaria cases from your household this year to the Health Centre?</b> | <i>Ask.</i>             |                     |                                                     | * |        |
|       |                                                                                                              |                         | 1                   | All malaria cases reported to the Health Centre     |   | Green  |
|       |                                                                                                              |                         | 2                   | Some malaria cases reported to Health Centre        |   | Yellow |
|       |                                                                                                              |                         | 4                   | None of the malaria cases reported to Health Centre |   | Red    |

|             |                                                                                        |                                                                                                                                                                                                                                                                                                                                                  |           |                            |   |  |
|-------------|----------------------------------------------------------------------------------------|--------------------------------------------------------------------------------------------------------------------------------------------------------------------------------------------------------------------------------------------------------------------------------------------------------------------------------------------------|-----------|----------------------------|---|--|
| <b>G8MX</b> | Has the household scored RED in any of the Malaria Protection questions?               | If yes, then this household is at risk and needs improvement.                                                                                                                                                                                                                                                                                    | YES or NO |                            |   |  |
| <b>G8MY</b> | Has the household scored YELLOW in any of the Malaria Protection questions?            | If yes, then this household has made progress but needs further improvement.                                                                                                                                                                                                                                                                     | YES or NO |                            |   |  |
| <b>G8MZ</b> | <b>RED, YELLOW or GREEN</b>                                                            | <i>The household has achieved the following score for this indicator.<br/>         If Red, household is at risk and needs to improve.<br/>         If Yellow, household has made progress but needs further improvement.<br/>         If Green, congratulate household as they have achieved excellent hygiene standards for this indicator.</i> |           |                            |   |  |
|             |                                                                                        |                                                                                                                                                                                                                                                                                                                                                  |           |                            |   |  |
|             |                                                                                        |                                                                                                                                                                                                                                                                                                                                                  |           |                            |   |  |
|             |                                                                                        |                                                                                                                                                                                                                                                                                                                                                  |           |                            |   |  |
|             |                                                                                        |                                                                                                                                                                                                                                                                                                                                                  |           |                            |   |  |
| <b>G9N1</b> | <b>1 PROTEIN INTAKE - How many times in the last week have you eaten fish or meat?</b> | <i>Ask.</i>                                                                                                                                                                                                                                                                                                                                      |           |                            | * |  |
|             |                                                                                        |                                                                                                                                                                                                                                                                                                                                                  | 1         | Every day                  |   |  |
|             |                                                                                        |                                                                                                                                                                                                                                                                                                                                                  | 2         | Three times this last week |   |  |
|             |                                                                                        |                                                                                                                                                                                                                                                                                                                                                  | 4         | Twice this last week       |   |  |
|             |                                                                                        |                                                                                                                                                                                                                                                                                                                                                  | 8         | Once in the last week      |   |  |
|             |                                                                                        |                                                                                                                                                                                                                                                                                                                                                  | 16        | Never                      |   |  |
| <b>G9N2</b> | <b>2 VEGETABLE INTAKE - How many times in the last week have you eaten vegetables?</b> | <i>Ask.</i>                                                                                                                                                                                                                                                                                                                                      |           |                            | * |  |
|             |                                                                                        |                                                                                                                                                                                                                                                                                                                                                  | 1         | Every day                  |   |  |
|             |                                                                                        |                                                                                                                                                                                                                                                                                                                                                  | 2         | Three times this last week |   |  |
|             |                                                                                        |                                                                                                                                                                                                                                                                                                                                                  | 4         | Twice this last week       |   |  |
|             |                                                                                        |                                                                                                                                                                                                                                                                                                                                                  | 8         | Once in the last week      |   |  |
|             |                                                                                        |                                                                                                                                                                                                                                                                                                                                                  | 16        | Never                      |   |  |
| <b>G9N3</b> | <b>3 COOKED LEFTOVER STORAGE - Where do you store your leftover cooked food?</b>       | <i>Observe where leftover cooked food is stored.</i>                                                                                                                                                                                                                                                                                             |           |                            | * |  |
|             |                                                                                        |                                                                                                                                                                                                                                                                                                                                                  | 1         | Stored in fridge           |   |  |

|              |                                                                         |                                                                                                                                                                                                                                                                                                                       |           |                                                     |  |   |  |  |  |
|--------------|-------------------------------------------------------------------------|-----------------------------------------------------------------------------------------------------------------------------------------------------------------------------------------------------------------------------------------------------------------------------------------------------------------------|-----------|-----------------------------------------------------|--|---|--|--|--|
|              |                                                                         |                                                                                                                                                                                                                                                                                                                       | 2         | Stored in closed cupboard                           |  |   |  |  |  |
|              |                                                                         |                                                                                                                                                                                                                                                                                                                       | 4         | Stored in covered dish / pot                        |  |   |  |  |  |
|              |                                                                         |                                                                                                                                                                                                                                                                                                                       | 8         | Stored in open pot / dish inside the home           |  |   |  |  |  |
|              |                                                                         |                                                                                                                                                                                                                                                                                                                       | 16        | Stored in open pot / outside of the home            |  |   |  |  |  |
|              |                                                                         |                                                                                                                                                                                                                                                                                                                       | 32        | No leftover food stored                             |  |   |  |  |  |
| <b>G9N4</b>  | <b>4 PLACE OF PRODUCE STORAGE -</b><br>Where do you store your produce? | <i>Observe where staple food is stored e.g. rice, beans, maize.</i>                                                                                                                                                                                                                                                   |           |                                                     |  | * |  |  |  |
|              |                                                                         |                                                                                                                                                                                                                                                                                                                       | 1         | All food in Model Kitchen                           |  |   |  |  |  |
|              |                                                                         |                                                                                                                                                                                                                                                                                                                       | 2         | All inside in Model Food Store                      |  |   |  |  |  |
|              |                                                                         |                                                                                                                                                                                                                                                                                                                       | 4         | Well stored in dedicated place                      |  |   |  |  |  |
|              |                                                                         |                                                                                                                                                                                                                                                                                                                       | 8         | Stored anywhere                                     |  |   |  |  |  |
|              |                                                                         |                                                                                                                                                                                                                                                                                                                       | 16        | Not stored                                          |  |   |  |  |  |
| <b>G9N5</b>  | <b>5 FOOD STORE STANDARD</b>                                            | <i>Observe hygiene status of food and / or produce storage.</i>                                                                                                                                                                                                                                                       |           |                                                     |  | * |  |  |  |
|              |                                                                         |                                                                                                                                                                                                                                                                                                                       | 1         | Excellent: clean floor, shelves & closed containers |  |   |  |  |  |
|              |                                                                         |                                                                                                                                                                                                                                                                                                                       | 2         | Good: shelves & closed containers                   |  |   |  |  |  |
|              |                                                                         |                                                                                                                                                                                                                                                                                                                       | 4         | Average: closed containers                          |  |   |  |  |  |
|              |                                                                         |                                                                                                                                                                                                                                                                                                                       | 8         | Poor: damp dirty floor, no closed containers        |  |   |  |  |  |
|              |                                                                         |                                                                                                                                                                                                                                                                                                                       | 16        | Very poor: dirty damp floor, flies, vermin          |  |   |  |  |  |
| <b>G9NX</b>  | Has the household scored RED in any of the Nutrition questions?         | If yes, then this household is at risk and needs improvement.                                                                                                                                                                                                                                                         | YES or NO |                                                     |  |   |  |  |  |
| <b>G9NY</b>  | Has the household scored YELLOW in any of the Nutrition questions?      | If yes, then this household has made progress but needs further improvement.                                                                                                                                                                                                                                          | YES or NO |                                                     |  |   |  |  |  |
| <b>G9NZ</b>  | <b>RED, YELLOW or GREEN</b>                                             | <i>The household has achieved the following score for this indicator.<br/>If Red, household is at risk and needs to improve.<br/>If Yellow, household has made progress but needs further improvement.<br/>If Green, congratulate household as they have achieved excellent hygiene standards for this indicator.</i> |           |                                                     |  |   |  |  |  |
|              |                                                                         |                                                                                                                                                                                                                                                                                                                       |           |                                                     |  |   |  |  |  |
|              |                                                                         |                                                                                                                                                                                                                                                                                                                       |           |                                                     |  |   |  |  |  |
| <b>G10C1</b> | <b>1 PLACE OF COOKING</b>                                               | <i>Observe the place of cooking.</i>                                                                                                                                                                                                                                                                                  |           |                                                     |  | * |  |  |  |

|       |                                                        |                                                                             |    |                                                     |   |  |
|-------|--------------------------------------------------------|-----------------------------------------------------------------------------|----|-----------------------------------------------------|---|--|
|       |                                                        |                                                                             | 1  | Dedicated Model Kitchen                             |   |  |
|       |                                                        |                                                                             | 2  | Outside permanent kitchen                           |   |  |
|       |                                                        |                                                                             | 4  | Outside temporary kitchen                           |   |  |
|       |                                                        |                                                                             | 8  | Cooking shack shared with livestock                 |   |  |
|       |                                                        |                                                                             | 16 | No special place / fire made anywhere               |   |  |
| G10C2 | 2 CONSTRUCTION OF COOKING                              | <i>Observe the standard of the cooking place.</i>                           |    |                                                     | * |  |
|       |                                                        |                                                                             | 1  | Permanent                                           |   |  |
|       |                                                        |                                                                             | 2  | Semi permanent                                      |   |  |
|       |                                                        |                                                                             | 4  | Temporary                                           |   |  |
|       |                                                        |                                                                             | 8  | Shack                                               |   |  |
| G10C3 | 3 INTERIOR FACILITIES OF COOKING PLACE                 | <i>Observe the storage facility inside.</i>                                 |    |                                                     | * |  |
|       |                                                        |                                                                             | 1  | Model Kitchen                                       |   |  |
|       |                                                        |                                                                             | 2  | Good kitchen                                        |   |  |
|       |                                                        |                                                                             | 4  | Upgraded shelter                                    |   |  |
|       |                                                        |                                                                             | 8  | Cooking shack                                       |   |  |
|       |                                                        |                                                                             | 16 | No storage facility                                 |   |  |
| G10C4 | 4 FUEL USED FOR COOKING - What do you use for cooking? | <i>Observe and ask.</i>                                                     |    |                                                     | * |  |
|       |                                                        |                                                                             | 1  | Electricity / Gas                                   |   |  |
|       |                                                        |                                                                             | 2  | Fuel efficient stove & wood                         |   |  |
|       |                                                        |                                                                             | 4  | Paraffin stove                                      |   |  |
|       |                                                        |                                                                             | 8  | Charcoal                                            |   |  |
|       |                                                        |                                                                             | 16 | Firewood                                            |   |  |
| G10C5 | 5 LIVESTOCK CONTAMINATION                              | <i>Observe if livestock is near cooking area and / or has access to it.</i> |    |                                                     | * |  |
|       |                                                        |                                                                             | 1  | Household has no livestock                          |   |  |
|       |                                                        |                                                                             | 2  | Livestock kept in clean stall far from cooking area |   |  |
|       |                                                        |                                                                             | 4  | Cooking area prevents access to any livestock       |   |  |
|       |                                                        |                                                                             | 8  | Livestock tethered inside or next to cooking place  |   |  |

|               |                                                                  |                                                                                                                                                                                                                                                                                                                          |           |                                                       |   |  |
|---------------|------------------------------------------------------------------|--------------------------------------------------------------------------------------------------------------------------------------------------------------------------------------------------------------------------------------------------------------------------------------------------------------------------|-----------|-------------------------------------------------------|---|--|
|               |                                                                  |                                                                                                                                                                                                                                                                                                                          | 16        | Livestock able to access cooking place                |   |  |
| <b>G10C6</b>  | <b>6 CLEANLINESS</b>                                             | <i>Observe the cleanliness of the cooking place.</i>                                                                                                                                                                                                                                                                     |           |                                                       | * |  |
|               |                                                                  |                                                                                                                                                                                                                                                                                                                          | 1         | Excellent: well swept, no garbage                     |   |  |
|               |                                                                  |                                                                                                                                                                                                                                                                                                                          | 2         | Good: quite well swept                                |   |  |
|               |                                                                  |                                                                                                                                                                                                                                                                                                                          | 4         | Fair: some sweeping, only recent garbage              |   |  |
|               |                                                                  |                                                                                                                                                                                                                                                                                                                          | 8         | Poor: dirty remains of food & garbage                 |   |  |
|               |                                                                  |                                                                                                                                                                                                                                                                                                                          | 16        | Very poor: no sweeping, a lot of food remains         |   |  |
| <b>G10CX</b>  | Has the household scored RED in any of the Cooking questions?    | If yes, then this household is at risk and needs improvement.                                                                                                                                                                                                                                                            | YES or NO |                                                       |   |  |
| <b>G10CY</b>  | Has the household scored YELLOW in any of the Cooking questions? | If yes, then this household has made progress but needs further improvement.                                                                                                                                                                                                                                             | YES or NO |                                                       |   |  |
| <b>G10CZ</b>  | <b>RED, YELLOW or GREEN</b>                                      | <i>The household has achieved the following score for this indicator.<br/> If Red, household is at risk and needs to improve.<br/> If Yellow, household has made progress but needs further improvement.<br/> If Green, congratulate household as they have achieved excellent hygiene standards for this indicator.</i> |           |                                                       |   |  |
|               |                                                                  |                                                                                                                                                                                                                                                                                                                          |           |                                                       |   |  |
|               |                                                                  |                                                                                                                                                                                                                                                                                                                          |           |                                                       |   |  |
|               |                                                                  |                                                                                                                                                                                                                                                                                                                          |           |                                                       |   |  |
| <b>G11CC1</b> | <b>1 CLOTHING CLEANLINESS</b>                                    | <i>Observe the state of children's clothes.</i>                                                                                                                                                                                                                                                                          |           |                                                       | * |  |
|               |                                                                  |                                                                                                                                                                                                                                                                                                                          | 1         | Children in clean clothes                             |   |  |
|               |                                                                  |                                                                                                                                                                                                                                                                                                                          | 2         | Average standard – fairly clean clothes               |   |  |
|               |                                                                  |                                                                                                                                                                                                                                                                                                                          | 4         | Children in dirty clothes                             |   |  |
| <b>G11CC2</b> | <b>2 SEGREGATED BEDROOMS</b>                                     | <i>Observe whether children have their own bed.</i>                                                                                                                                                                                                                                                                      |           |                                                       | * |  |
|               |                                                                  |                                                                                                                                                                                                                                                                                                                          | 1         | Boys and girls sleep in different rooms               |   |  |
|               |                                                                  |                                                                                                                                                                                                                                                                                                                          | 2         | Boys and girls in same room but have own beds         |   |  |
|               |                                                                  |                                                                                                                                                                                                                                                                                                                          | 4         | Boys and girls share same bedding                     |   |  |
| <b>G11CC3</b> | <b>3 ADULT SHARING</b>                                           | <i>Observe whether children sleep in the same room as their parents.</i>                                                                                                                                                                                                                                                 |           |                                                       |   |  |
|               |                                                                  |                                                                                                                                                                                                                                                                                                                          | 1         | Children over 2 years have separate rooms from adults |   |  |
|               |                                                                  |                                                                                                                                                                                                                                                                                                                          | 2         | Children over 5 years have separate rooms from adults |   |  |
|               |                                                                  |                                                                                                                                                                                                                                                                                                                          | 4         | All children and adults sleep in same room            |   |  |

|        |                                                                     |                                                                                                                                                                                                                                                                                                                          |           |                                                       |   |        |
|--------|---------------------------------------------------------------------|--------------------------------------------------------------------------------------------------------------------------------------------------------------------------------------------------------------------------------------------------------------------------------------------------------------------------|-----------|-------------------------------------------------------|---|--------|
| G11CC4 | <b>4 CLEANLINES OF CHILDREN'S FACES</b>                             | <i>Observe the faces of the children under 5 years in the household.</i>                                                                                                                                                                                                                                                 |           |                                                       | * |        |
|        |                                                                     |                                                                                                                                                                                                                                                                                                                          | 1         | All children with clean faces                         |   | Green  |
|        |                                                                     |                                                                                                                                                                                                                                                                                                                          | 2         | Some children with dirty faces                        |   | Yellow |
|        |                                                                     |                                                                                                                                                                                                                                                                                                                          | 4         | All children with dirty faces                         |   | Red    |
| G11CC5 | <b>5 CHILDREN'S HEAD</b>                                            | <i>Observe the heads of the children under 5.</i>                                                                                                                                                                                                                                                                        |           |                                                       | * |        |
|        |                                                                     |                                                                                                                                                                                                                                                                                                                          | 1         | All children have clean hair / no lice / no ringworm  |   | Green  |
|        |                                                                     |                                                                                                                                                                                                                                                                                                                          | 2         | Some children have clean hair / no lice / no ringworm |   | Yellow |
|        |                                                                     |                                                                                                                                                                                                                                                                                                                          | 4         | All children have dirty hair and have lice / ringworm |   | Red    |
| G11CCX | Has the household scored RED in any of the Child Care questions?    | If yes, then this household is at risk and needs improvement.                                                                                                                                                                                                                                                            | YES or NO |                                                       |   |        |
| G11CCY | Has the household scored YELLOW in any of the Child Care questions? | If yes, then this household has made progress but needs further improvement.                                                                                                                                                                                                                                             | YES or NO |                                                       |   |        |
| G11CCZ | <b>RED, YELLOW or GREEN</b>                                         | <i>The household has achieved the following score for this indicator.<br/> If Red, household is at risk and needs to improve.<br/> If Yellow, household has made progress but needs further improvement.<br/> If Green, congratulate household as they have achieved excellent hygiene standards for this indicator.</i> |           |                                                       |   |        |
|        |                                                                     |                                                                                                                                                                                                                                                                                                                          |           |                                                       |   |        |

End of Survey

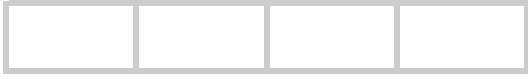

Supplement: 12889_2019_7991_MOESM1_ESM.pdf [file 12889_2019_7991_MOESM1_ESM.pdf]
